# Supplementary material for: Ischaemic stroke etiological classification system: the agreement analysis of CISS, SPARKLE and TOAST
Source: PubMed Central journal article supplement — Stroke Vasc Neurol. 2019 Jun 2;4(3):123–8. doi: 10.1136/svn-2018-000226 (PMC6812642; doi:10.1136/svn-2018-000226), 2019-06-02
Supplement: svn-2018-000226supp001.pdf [file svn-2018-000226supp001.pdf]

## Supplementary Tables

Table 1. Patient characteristics of the TOAST

|                         | LAA<br>(n=139) | CE<br>(n=35) | SVD<br>(n=31) | OE<br>(n=16) | UE<br>(n=78) | Total (%)<br>(n=299) |
|-------------------------|----------------|--------------|---------------|--------------|--------------|----------------------|
| Age ( $\bar{x}\pm SD$ ) | 59.9±11.1      | 64.7±17.8    | 55.6±8.6      | 40.2±15.0    | 57.2±13.3    | 58.3±13.5            |
| Male (%)                | 85.6           | 60.0         | 71.0          | 68.8         | 76.9         | 77.9                 |
| Hypertention (%)        | 40.3           | 31.4         | 45.2          | 6.3          | 43.6         | 38.8                 |
| Diabetes (%)            | 20.1           | 17.1         | 12.9          | 6.3          | 16.7         | 17.4                 |
| Dyslipidemia (%)        | 70.5           | 69.0         | 63.3          | 64.3         | 65.8         | 68.1                 |
| Smoking (%)             | 56.1           | 45.7         | 51.6          | 37.6         | 52.6         | 52.6                 |
| CAHD (%)                | 10.1           | 22.9         | 16.1          | 6.3          | 9.0          | 11.7                 |
| MI (%)                  | 4.3            | 5.7          | 3.2           | 0            | 3.9          | 3.3                  |
| AF (%)                  | 0.7            | 17.1         | 0             | 0            | 1.3          | 2.7                  |

Table 2. Patient characteristics of the SPARKLE

|                         | LAA<br>(n=165) | CE<br>(n=32) | SVD<br>(n=29) | OE<br>(n=17) | UE<br>(n=56) | Total (%)<br>(n=299) |
|-------------------------|----------------|--------------|---------------|--------------|--------------|----------------------|
| Age ( $\bar{x}\pm SD$ ) | 60.2±11.0      | 64.0±18.4    | 57.0±8.2      | 41.2±15.0    | 54.8±14.2    | 58.3±13.5            |
| Male (%)                | 86.1           | 53.1         | 69.0          | 64.7         | 76.8         | 77.9                 |
| Hypertention (%)        | 42.4           | 28.1         | 41.4          | 5.9          | 42.9         | 38.8                 |
| Diabetes (%)            | 22.4           | 15.6         | 13.8          | 5.9          | 8.9          | 17.4                 |
| Dyslipidemia (%)        | 70.6           | 59.3         | 67.9          | 60.0         | 67.3         | 68.1                 |
| Smoking (%)             | 57.6           | 34.4         | 48.3          | 35.2         | 55.4         | 52.6                 |
| CAHD (%)                | 10.3           | 18.8         | 10.3          | 5.9          | 14.3         | 11.7                 |
| MI (%)                  | 3.6            | 3.1          | 3.4           | 0            | 5.4          | 3.3                  |
| AF (%)                  | 0.6            | 18.8         | 0             | 0            | 1.8          | 2.7                  |

Table 3. Patient characteristics of the CISS

|                         | LAA<br>(n=139) | CE<br>(n=35) | SVD<br>(n=31) | OE<br>(n=16) | UE<br>(n=78) | Total (%)<br>(n=299) |
|-------------------------|----------------|--------------|---------------|--------------|--------------|----------------------|
| Age ( $\bar{x}\pm SD$ ) | 60.0±10.8      | 64.8±17.9    | 55.7±8.5      | 41.2±15.0    | 49.4±14.8    | 58.3±13.5            |
| Male (%)                | 83.4           | 61.1         | 68.4          | 64.7         | 75.0         | 77.9                 |
| Hypertention (%)        | 44.7           | 30.6         | 36.8          | 5.9          | 28.6         | 38.8                 |
| Diabetes (%)            | 20.1           | 16.7         | 10.5          | 5.9          | 10.7         | 17.4                 |
| Dyslipidemia (%)        | 68.2           | 66.7         | 76.5          | 60.0         | 68.0         | 68.1                 |
| Smoking (%)             | 57.8           | 44.5         | 42.1          | 35.2         | 42.8         | 52.6                 |
| CAHD (%)                | 10.6           | 19.4         | 10.5          | 5.9          | 14.3         | 11.7                 |
| MI (%)                  | 3.5            | 5.6          | 0             | 0            | 3.6          | 3.3                  |
| AF (%)                  | 1.0            | 16.7         | 0             | 0            | 0            | 2.7                  |
